# Supplementary material for: Exploring the Biomaterial-Induced Secretome: Physical Bone Substitute Characteristics Influence the Cytokine Expression of Macrophages
Source: MDPI journal article supplement (doi:10.3390/ijms22094442), 2021-04-24
Supplement: s1 [file s1]

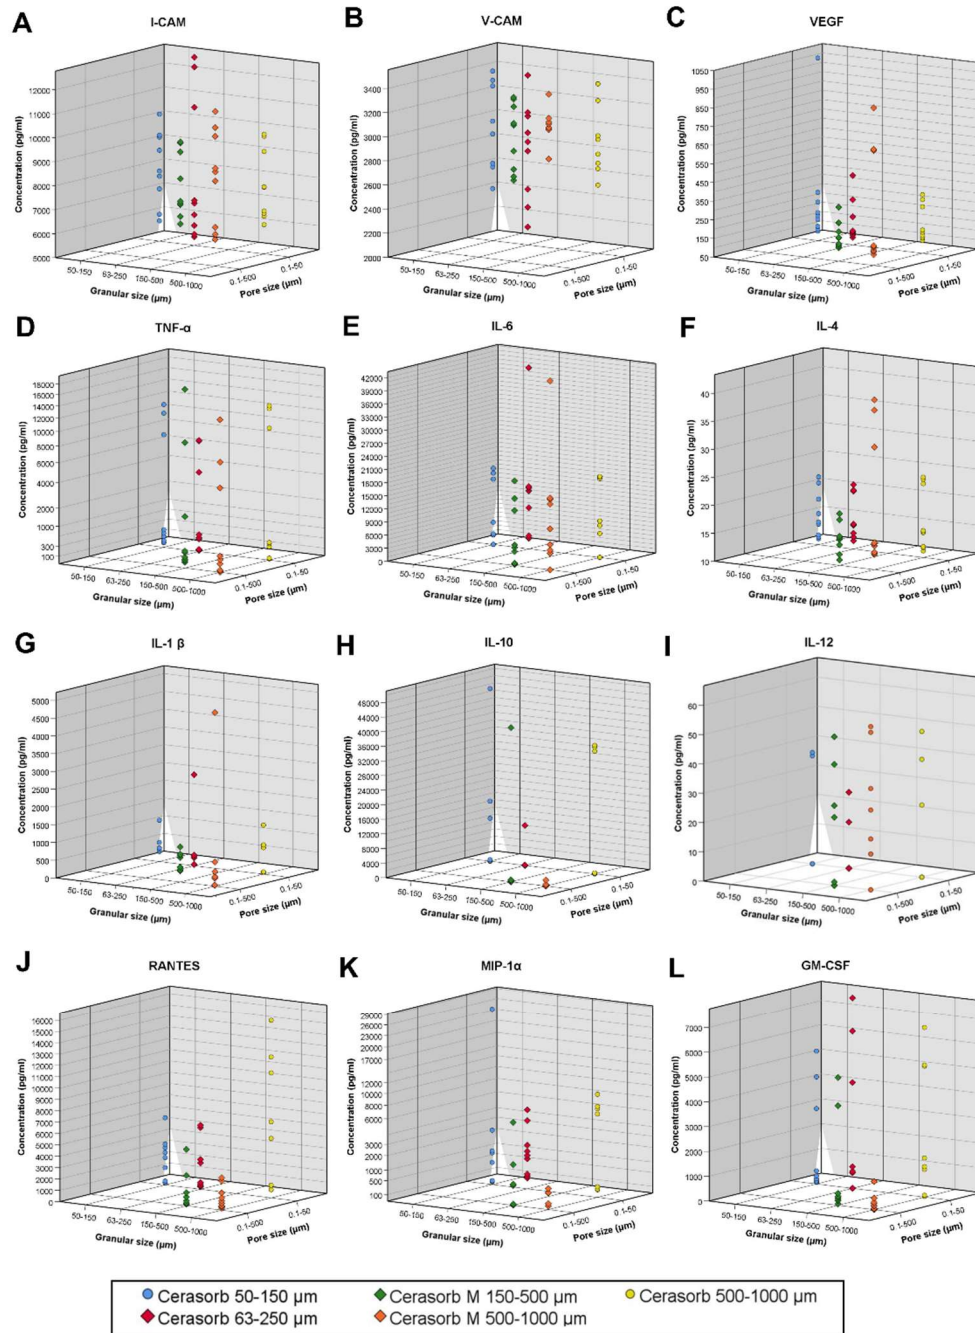

**Figure S1.** Cytokine expression pattern of monocytes cultivated on the different bone substitutes. The graphs show the cytokine concentration (y -axis) in relation to the granular size (x -axis), pore size (z -axis) and granular shape. The granular shape is displayed as the shape of each individual value: round shape – round value points, polygonal – square shaped value points. (A) I-CAM, (B) V-CAM, (C) VEGF, (D) TNF- $\alpha$ , (E) IL-6, (F) IL-4, (G) IL-1 $\beta$ , (H) IL-10, (I) IL-12, (J) RANTES, (K) MIP-1 $\alpha$  and (L) GM-CSF.

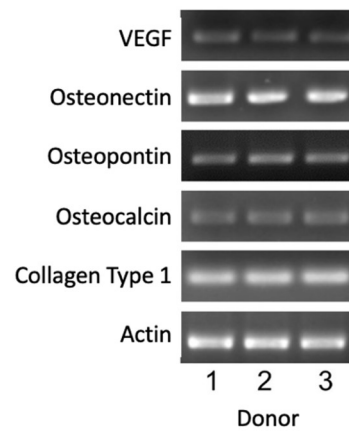

**Figure S2.** Characterization of the gene expression of the three osteoblast donors using RNA obtained from cells at passage 3.
